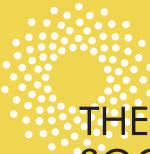

Published by  
THE AMERICAN  
SOCIETY FOR  
CELL  
BIOLOGY

*The science of life, the life of science*

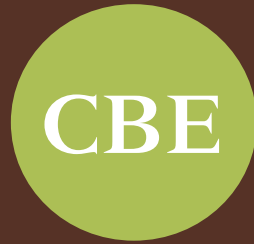

# Life Sciences Education

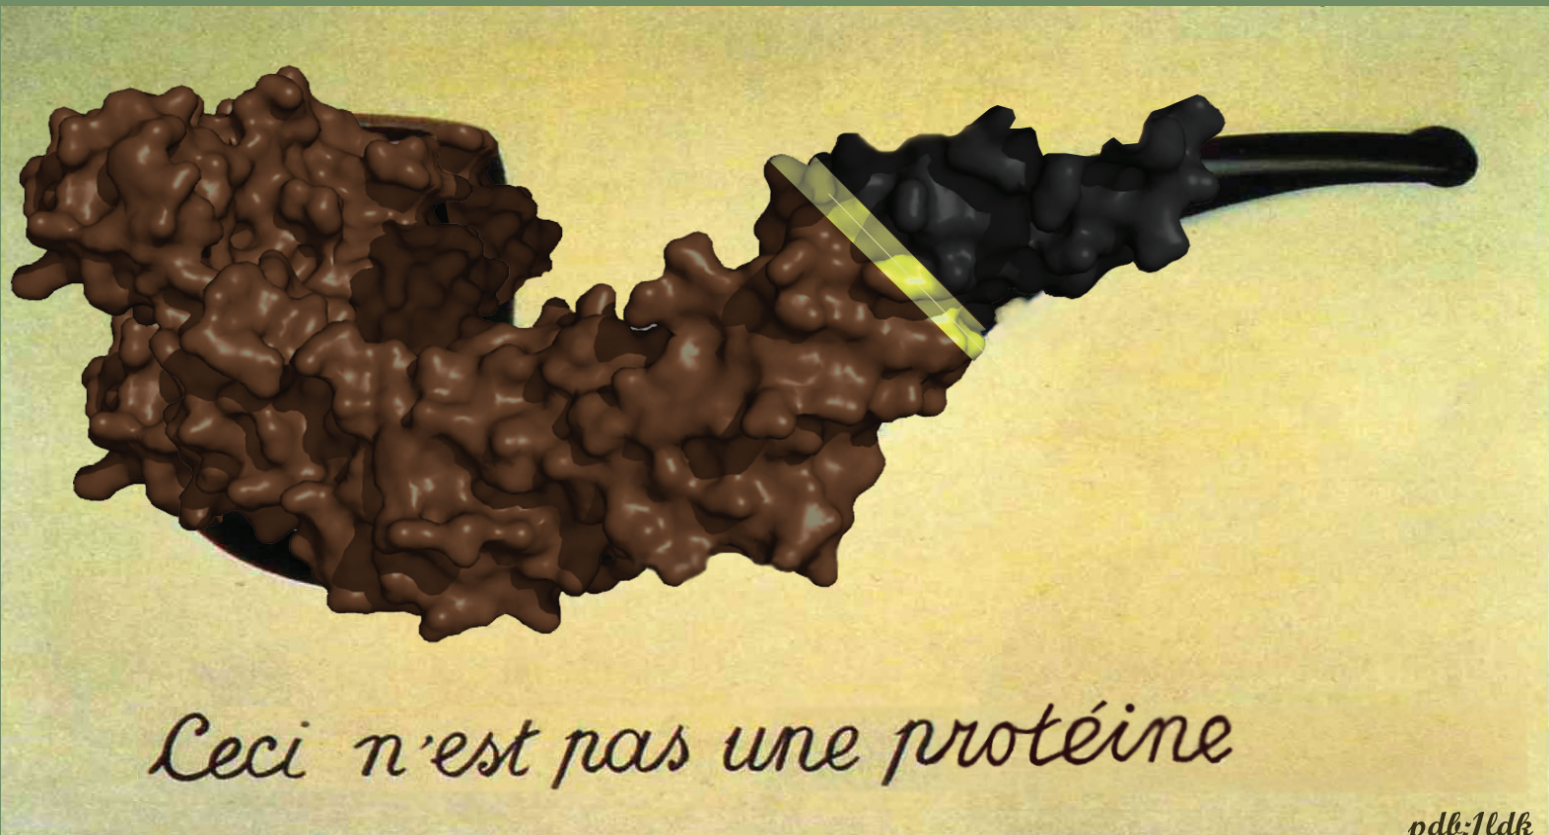

## Representations in Biology Learning
