# Table of Contents

## EDITORIAL

**Biology Education Research—A Cultural (R)evolution**  
 Erin L. Dolan . . . . . 333–334

## LETTERS TO THE EDITOR

**Using Learning Principle in Faculty Development Workshops**  
 Amy Mulnix . . . . . 335–336

**Providing Structure for Research Students Coming and Going**  
 A. Malcolm Campbell, Meredith J. Nakano, Caroline J. Vrana, Todd T. Eckdahl, Jeffrey L. Poet,  
 and Laurie J. Heyer . . . . . 337–338

## FEATURES

*Approaches to Biology Teaching and Learning*  
**Barriers to Faculty Pedagogical Change: Lack of Training, Time, Incentives,  
 and . . . Tensions with Professional Identity?**  
 Sara E. Brownell and Kimberly D. Tanner . . . . . 339–346

*From the National Science Foundation*  
**The Vision Is Set, Now Help Chronicle the Change**  
 Terry Woodin, Jason Feser, and Jose Herrera . . . . . 347–350

*Current Insights*  
**Recent Research in Science Teaching and Learning**  
 Deborah Allen . . . . . 351–352

## ARTICLES

**Biological Inquiry: A New Course and Assessment Plan in Response to the Call to Transform  
 Undergraduate Biology**  
 Ellen S. Goldey, Clarence L. Abercrombie, Tracie M. Ivy, Daved I. Kusher, John F. Moeller,  
 Doug A. Rayner, Charles F. Smith, and Natalie W. Spivey . . . . . 353–363

**Developing a Test of Scientific Literacy Skills (TOSLS): Measuring Undergraduates' Evaluation  
 of Scientific Information and Arguments**  
 Cara Gormally, Peggy Brickman, and Mary Lutz . . . . . 364–377

**Linguistic Analysis of Project Ownership for Undergraduate Research Experiences**  
 D. I. Hanauer, J. Frederick, B. Fotinakes, and S. A. Strobel . . . . . 378–385

**Analysis of Student Performance in Large-Enrollment Life Science Courses**  
 Leah Renée Creech and Ryan D. Sweeder . . . . . 386–391

**Collaborative Testing Improves Performance but Not Content Retention in a Large-Enrollment  
 Introductory Biology Class**  
 Hayley Leight, Cheston Saunders, Robin Calkins, and Michelle Withers . . . . . 392–401

**Peer Learning and Support of Technology in an Undergraduate Biology Course to Enhance  
 Deep Learning**  
 Masha Tsaushu, Tali Tal, Ornit Sagy, Yael Kali, Shimon Gepstein, and Dan Zilberstein . . . . . 402–412

**Teaching Neuroscience to Science Teachers: Facilitating the Translation of Inquiry-Based  
 Teaching Instruction to the Classroom**  
 G. H. Roehrig, M. Michlin, L. Schmitt, C. MacNabb, and J. M. Dubinsky . . . . . 413–424

|                                                                                                                                                                                                                                  |         |
|----------------------------------------------------------------------------------------------------------------------------------------------------------------------------------------------------------------------------------|---------|
| <b>Students Fail to Transfer Knowledge of Chromosome Structure to Topics Pertaining to Cell Division</b><br>Dina L. Newman, Christina M. Catavero, and L. Kate Wright . . . . .                                                  | 425–436 |
| <b>Education Catching Up with Science: Preparing Students for Three-Dimensional Literacy in Cell Biology</b><br>Ijsbrand M. Kramer, Hassen-Reda Dahmani, Pamina Delouche, Marissa Bidabe,<br>and Patricia Schneeberger . . . . . | 437–447 |

*On the Cover*

“Ceci n’est pas une protéine,” or “This is not a protein,” pays tribute to René Magritte (1898–1967), an artist who explored the relationship among an object, its identification, and its representation. One of his best-known works, which served as a source of inspiration for this cover, is “La trahison des images” (1929), or “The treachery of images.” It depicts a pipe accompanied by a legend that says, “Ceci n’est pas une pipe” (“this is not a pipe;” see: <http://en.wikipedia.org/wiki/File:MagrittePipe.jpg>). The image is deceiving in that, however realistic it may appear, the object is not a pipe but a representation of it. Similarly, molecular science involves depictions of molecular objects, which are necessarily representational and thus highly abstract. For example, proteins are identified through complicated experimental procedures such as functional tests or X-ray crystallography. This presents a challenge for educators and students alike. Although images are abundant in instructional materials, how students make meaning of them, including how the images represent biological molecules and phenomena, remains largely unstudied. The study by Kramer and colleagues in this issue provides new insights into this subject. Returning to the cover image, indeed, the object is not a protein. It is a computer-generated surface representation of the scaffold section of ubiquitin ligase (*pdb:1ldk*), combined with Magritte’s representation of a mouthpiece of a pipe. What do you suppose it means?
